# Supplementary material for: Post-Pandemic Shifts in Pediatric Respiratory Pathogens and Co-Infection Dynamics in Northwest China: A Large-Scale Retrospective Study from 2021 to 2025
Source: Research Square preprint supplement (doi:10.21203/rs.3.rs-7467354/v1), 2025-09-17
Supplement: Supplementary file 1 [file 087eff28a473dc3c32b98e55.docx]

**Supplementary Table 5.** Comparison of Co-Infection rates between epidemic and post-epidemic periods.

| **Number of co-infections** | **Positive (%)** | **Epidemic (%)** | **Post-Epidemic (%)** | **χ²** | ***p*** |
| --- | --- | --- | --- | --- | --- |
| **2** | 3407 (9.04) | 307 (3.92) | 3100 (10.38) | 271.22 | **<0.001** |
| **3** | 358 (0.95) | 10 (0.13) | 348 (1.17) | 68.95 | **<0.001** |
| **Four or more** | 29 (0.08) | 2 (0.03) | 27 (0.09) | 2.6 | 0.107 |
| **4** | 27 (0.08) | 2 (0.03) | 25 (0.08) | - | - |
| **5** | 2 (0.01) | 0 (0) | 2 (0.01) | - | - |

* χ² is the chi-square test statistic used to compare detection rates between the two periods. Statistical significance was determined at *p* < 0.05.
