# Supplementary material for: Post-Pandemic Shifts in Pediatric Respiratory Pathogens and Co-Infection Dynamics in Northwest China: A Large-Scale Retrospective Study from 2021 to 2025
Source: Research Square preprint supplement (doi:10.21203/rs.3.rs-7467354/v1), 2025-09-17
Supplement: Supplementary file 2 [file 17675e463a39fb8fce98dee4.docx]

**Supplementary Table 2.** Comparison of respiratory pathogen positivity rates between epidemic and post-epidemic periods.

| **Pathogen** | **Positive (%)** | **Epidemic (%)** | **Post-Epidemic (%)** | **χ²** | ***p*** |
| --- | --- | --- | --- | --- | --- |
| **HRV** | 4370(11.60) | 853(10.90) | 3517(11.78) | 4.579 | 0.0324 |
| **HPIV** | 1764(4.68) | 356(4.55) | 1408(4.72) | 0.347 | 0.5556 |
| **HADV** | 1142(3.03) | 229(2.93) | 913(3.06) | 0.32 | 0.5713 |
| **HMPV** | 1155(3.07) | 287(3.67) | 868(2.91) | 11.818 | **< 0.001** |
| **HboV** | 251(0.67) | 80(1.02) | 171(0.57) | 18.273 | **< 0.001** |
| **HCOV** | 354(0.94) | 64(0.82) | 290(0.97) | 1.407 | 0.2356 |
| **Ch** | 152(0.40) | 19(0.24) | 133(0.45) | 5.843 | **0.0156** |
| **Mp** | 3686(9.78) | 340(4.35) | 3346(11.21) | 329.991 | **< 0.001** |
| **InfA** | 2326(6.17) | 408(5.21) | 1981(6.64) | 20.838 | **< 0.001** |
| **InfB** | 578(1.53) | 170(2.17) | 408(1.37) | 26.141 | **< 0.001** |
| **HRSV** | 3264(8.66) | 392(5.01) | 2872(9.62) | 165.921 | **< 0.001** |

* χ² is the chi-square test statistic used to compare detection rates between the two periods. Statistical significance was determined at *p* < 0.05.
