# Supplementary material for: Post-Pandemic Shifts in Pediatric Respiratory Pathogens and Co-Infection Dynamics in Northwest China: A Large-Scale Retrospective Study from 2021 to 2025
Source: Research Square preprint supplement (doi:10.21203/rs.3.rs-7467354/v1), 2025-09-17
Supplement: Supplementary file 3 [file 24b406c01a6fff3690f6533c.docx]

**Supplementary Table 3.** Comparison of respiratory pathogen positivity between male and female patients using Chi-square test.

| **Pathogen** | **Male(%)** | **Female (%)** | **χ²** | ***p*** |
| --- | --- | --- | --- | --- |
| **Ch** | 89(0.39) | 63(0.41) | 0.4512 | 0.502 |
| **HBoV** | 145(0.65) | 106(0.67) | 0.0086 | 0.926 |
| **HCOV** | 200(0.95) | 154(0.93) | 0.0712 | 0.789 |
| **InfB** | 335(1.50) | 243(1.55) | 0.6244 | 0.429 |
| **HMPV** | 650(3.13) | 505(3.01) | 0.459 | 0.498 |
| **HADV** | 658(3.00) | 484(3.04) | 0.0452 | 0.831 |
| **HPIV** | 1046(4.46) | 718(4.84) | 46.57 | **< 0.05** |
| **InfA** | 1381(5.87) | 945(6.39) | 1.2642 | 0.262 |
| **HRSV** | 1943(8.20) | 1321(9.00) | 1.4116 | 0.235 |
| **Mp** | 1985(10.56) | 1701(9.19) | 74.56 | **<0.01** |
| **HRV** | 2626(10.83) | 1744(12.16) | 12.29 | **<0.01** |

* χ² is the chi-square test statistic used to compare detection rates between the male and female. Statistical significance was determined at *p* < 0.05.
