# Supplementary material for: Post-Pandemic Shifts in Pediatric Respiratory Pathogens and Co-Infection Dynamics in Northwest China: A Large-Scale Retrospective Study from 2021 to 2025
Source: Research Square preprint supplement (doi:10.21203/rs.3.rs-7467354/v1), 2025-09-17
Supplement: Supplementary file 4 [file 3ac6ce7dbf840766904032a4.docx]

**Supplementary Table 6.** Correlation table between Co-Infections of various pathogens during the epidemic.

| **Pathogen** | **HPIV** | | | **HADV** | | | **HMPV** | | | **HboV** | | | **HCOV** | | | **Ch** | | | **Mp** | | | **InfA** | | | **InfB** | | | **HRSV** | | |
| --- | --- | --- | --- | --- | --- | --- | --- | --- | --- | --- | --- | --- | --- | --- | --- | --- | --- | --- | --- | --- | --- | --- | --- | --- | --- | --- | --- | --- | --- | --- |
|  | **n** | **V** | ***p*** | **n** | **V** | ***p*** | **n** | **V** | ***p*** | **n** | **V** | ***p*** | **n** | **V** | ***p*** | **n** | **V** | ***p*** | **n** | **V** | ***p*** | **n** | **V** | ***p*** | **n** | **V** | ***p*** | **n** | **V** | ***p*** |
| **HRV** | 52 | 0.325 | **<0.001** | 39 | 0.287 | **<0.001** | 24 | 0.211 | **<0.001** | 14 | 0.161 | **<0.001** | 13 | 0.144 | **<0.001** | 1 | 0.067 | **0.026** | 27 | 0.232 | **<0.001** | 6 | 0.067 | **<0.001** | 5 | 0.085 | **<0.001** | 20 | 0.178 | **<0.001** |
| **HPIV** | - | - | - | 13 | 0.119 | **<0.001** | 19 | 0.219 | **<0.001** | 5 | 0.072 | **<0.001** | 7 | 0.100 | **<0.001** | 0 | 0.001 | 1 | 9 | 0.095 | **<0.001** | 1 | 0.009 | 0.376 | 2 | 0.043 | **0.021** | 10 | 0.114 | **<0.001** |
| **HADV** | - | - | - | - | - | - | 5 | 0.062 | **<0.001** | 2 | 0.031 | 0.052 | 4 | 0.066 | **0.001** | 0 | 0.001 | 1 | 7 | 0.088 | **<0.001** | 4 | 0.070 | **<0.001** | 2 | 0.050 | **0.011** | 9 | 0.121 | **<0.001** |
| **HMPV** | - | - | - | - | - | - | - | - | - | 0 | 0.006 | 1 | 0 | 0.006 | 1 | 0 | 0.001 | 1 | 4 | 0.059 | **0.001** | 0 | 0.006 | 1 | 5 | 0.165 | **<0.001** | 2 | 0.028 | 0.066 |
| **HboV** | - | - | - | - | - | - | - | - | - | - | - | - | 2 | 0.053 | **0.011** | 0 | 0.001 | 1 | 1 | 0.016 | 0.237 | 4 | 0.119 | **<0.001** | 0 | 0.003 | 1 | 6 | 0.133 | **<0.001** |
| **HCOV** | - | - | - | - | - | - | - | - | - | - | - | - | - | - | - | 0 | 0.001 | 1 | 2 | 0.036 | **0.033** | 6 | 0.176 | **<0.001** | 0 | 0.003 | 1 | 2 | 0.039 | **0.027** |
| **Ch** | - | - | - | - | - | - | - | - | - | - | - | - | - | - | - | - | - | - | 0 | 0.001 | 1 | 0 | 0.001 | 1 | 0 | 0.001 | 1 | 0 | 0.001 | 1 |
| **Mp** | - | - | - | - | - | - | - | - | - | - | - | - | - | - | - | - | - | - | - | - | - | 7 | 0.155 | **<0.001** | 1 | 0.029 | 0.113 | 4 | 0.061 | **0.001** |
| **InfA** | - | - | - | - | - | - | - | - | - | - | - | - | - | - | - | - | - | - | - | - | - | - | - | - | 0 | 0.003 | 1 | 3 | 0.067 | **0.001** |
| **InfB** | - | - | - | - | - | - | - | - | - | - | - | - | - | - | - | - | - | - | - | - | - | - | - | - | - | - | - | 0 | 0.004 | 1 |

*This table presents the associations between co-infections of respiratory pathogens in pediatric patients with respiratory tract infections in Northwest China during the epidemic period. The number of co-infection cases (n), Cramér's V coefficient (V), and

p-value from the chi-square test are reported for each pathogen pair. Cramér's V measures the strength of association between two pathogens (range: 0 – 1), where V < 0.1 indicates a weak association, 0.1 – 0.3 a moderate association,

and > 0.3 a strong association. The p-value assesses the statistical significance of the independence between pathogen pairs, with p < 0.05 indicating a significant association.
