# Supplementary material for: Post-Pandemic Shifts in Pediatric Respiratory Pathogens and Co-Infection Dynamics in Northwest China: A Large-Scale Retrospective Study from 2021 to 2025
Source: Research Square preprint supplement (doi:10.21203/rs.3.rs-7467354/v1), 2025-09-17
Supplement: Supplementary file 5 [file 6bb9c4f210ecfffac493e44a.docx]

**Supplementary Table 6.** Correlation table between Co-Infections of various pathogens during the post-epidemic.

| **Pathogen** | **HPIV** | | | **HADV** | | | **HMPV** | | | **HboV** | | | **HCOV** | | | **Ch** | | | **Mp** | | | **InfA** | | | **InfB** | | | **HRSV** | | |
| --- | --- | --- | --- | --- | --- | --- | --- | --- | --- | --- | --- | --- | --- | --- | --- | --- | --- | --- | --- | --- | --- | --- | --- | --- | --- | --- | --- | --- | --- | --- |
|  | **n** | **V** | ***p*** | **n** | **V** | ***p*** | **n** | **V** | ***p*** | **n** | **V** | ***p*** | **n** | **V** | ***p*** | **n** | **V** | ***p*** | **n** | **V** | ***p*** | **n** | **V** | ***p*** | **n** | **V** | ***p*** | **n** | **V** | ***p*** |
| **HRV** | 398 | 0.235 | **<0.001** | 317 | 0.168 | **<0.001** | 144 | 0.113 | **<0.001** | 111 | 0.119 | **<0.001** | 106 | 0.093 | **<0.001** | 36 | 0.082 | **<0.001** | 701 | 0.325 | **<0.001** | 108 | 0.111 | **<0.001** | 24 | 0.006 | 0.284 | 298 | 0.182 | **<0.001** |
| **HPIV** | - | - | - | 93 | 0.063 | **<0.001** | 50 | 0.054 | **<0.001** | 44 | 0.069 | **<0.001** | 59 | 0.083 | **<0.001** | 4 | 0.007 | 0.176 | 152 | 0.084 | **<0.001** | 19 | 0.018 | **0.004** | 14 | 0.012 | 0.05 | 128 | 0.117 | **<0.001** |
| **HADV** | - | - | - | - | - | - | 63 | 0.071 | **<0.001** | 21 | 0.022 | **0.001** | 37 | 0.042 | **<0.001** | 7 | 0.018 | **0.008** | 307 | 0.205 | **<0.001** | 45 | 0.065 | **<0.001** | 53 | 0.088 | **<0.001** | 77 | 0.054 | **<0.001** |
| **HMPV** | - | - | - | - | - | - | - | - | - | 11 | 0.019 | **0.004** | 12 | 0.016 | **0.013** | 1 | 0.000 | 1 | 90 | 0.078 | **<0.001** | 33 | 0.079 | **<0.001** | 13 | 0.027 | **<0.001** | 41 | 0.047 | **<0.001** |
| **HboV** | - | - | - | - | - | - | - | - | - | - | - | - | 12 | 0.028 | **<0.001** | 1 | 0.003 | 0.472 | 43 | 0.043 | **<0.001** | 6 | 0.012 | 0.059 | 2 | 0.002 | 1 | 28 | 0.043 | **<0.001** |
| **HCOV** | - | - | - | - | - | - | - | - | - | - | - | - | - | - | - | 4 | 0.021 | **0.009** | 86 | 0.091 | **<0.001** | 7 | 0.011 | 0.093 | 5 | 0.006 | 0.241 | 28 | 0.034 | **<0.001** |
| **Ch** | - | - | - | - | - | - | - | - | - | - | - | - | - | - | - | - | - | - | 5 | 0.004 | 0.419 | 4 | 0.024 | **0.005** | 0 | 0.005 | 1 | 6 | 0.018 | **0.012** |
| **Mp** | - | - | - | - | - | - | - | - | - | - | - | - | - | - | - | - | - | - | - | - | - | 0 | 0.024 | **<0.001** | 97 | 0.133 | **<0.001** | 138 | 0.083 | **<0.001** |
| **InfA** | - | - | - | - | - | - | - | - | - | - | - | - | - | - | - | - | - | - | - | - | - | - | - | - | 16 | 0.049 | **<0.001** | 56 | 0.098 | **<0.001** |
| **InfB** | - | - | - | - | - | - | - | - | - | - | - | - | - | - | - | - | - | - | - | - | - | - | - | - | - | - | - | 34 | 0.059 | **<0.001** |

*This table presents the associations between co-infections of respiratory pathogens in pediatric patients with respiratory tract infections in Northwest China during the post-epidemic period. The number of co-infection cases (n), Cramér's V coefficient (V), and

p-value from the chi-square test are reported for each pathogen pair. Cramér's V measures the strength of association between two pathogens (range: 0 – 1), where V < 0.1 indicates a weak association, 0.1 – 0.3 a moderate association,

and > 0.3 a strong association. The p-value assesses the statistical significance of the independence between pathogen pairs, with p < 0.05 indicating a significant association.
