# Supplementary material for: Post-Pandemic Shifts in Pediatric Respiratory Pathogens and Co-Infection Dynamics in Northwest China: A Large-Scale Retrospective Study from 2021 to 2025
Source: Research Square preprint supplement (doi:10.21203/rs.3.rs-7467354/v1), 2025-09-17
Supplement: Supplementary file 6 [file 9408ea986e5b212a4939afd8.docx]

**Supplementary Table 4.** Pairwise chi-square test results for respiratory pathogen positivity among age groups.

| **Pathogen** | **0-2 vs 3-5** | | **0-2 vs 6-12** | | **0-2 vs 13-18** | | **3-5 vs 6-12** | | **3-5 vs 13-18** | | **6-12 vs 13-18** | |
| --- | --- | --- | --- | --- | --- | --- | --- | --- | --- | --- | --- | --- |
|  | **χ²** | ***p*** | **χ²** | ***p*** | **χ²** | ***p*** | **χ²** | ***p*** | **χ²** | ***p*** | **χ²** | ***p*** |
| **HRV** | 0.071 | 0.790 | 40.534 | **<0.001** | 8.509 | **0.004** | 36.599 | **<0.001** | 8.821 | **0.0030** | 0.812 | 0.368 |
| **HPIV** | 82.144 | **<0.001** | 315.428 | **<0.001** | 23.819 | **<0.001** | 85.328 | **<0.001** | 6.438 | **0.0112** | 0.146 | 0.703 |
| **HADV** | 58.867 | **<0.001** | 69.747 | **<0.001** | 0.862 | 0.3533 | 0.371 | 0.5427 | 1.682 | 0.1947 | 2.271 | 0.132 |
| **HMPV** | 83.218 | **<0.001** | 45.411 | **<0.001** | 10.338 | **0.001** | 188.473 | **<0.001** | 26.242 | **<0.001** | 2.116 | 0.146 |
| **HboV** | 20.139 | **<0.001** | 79.402 | **<0.001** | 7.108 | **0.008** | 26.625 | **<0.001** | 3.109 | 0.0779 | 0.142 | 0.706 |
| **HCOV** | 1.157 | 0.282 | 8.867 | **0.0029** | 0.000 | 1.000 | 2.959 | 0.0854 | 0.044 | 0.8345 | 0.882 | 0.348 |
| **Ch** | 15.577 | **<0.001** | 42.865 | **<0.001** | 21.182 | **<0.001** | 73.051 | **<0.001** | 71.124 | **<0.001** | 1.176 | 0.278 |
| **Mp** | 549.698 | **<0.001** | 2165.587 | **<0.001** | 22.318 | **<0.001** | 435.408 | **<0.001** | 9.812 | **0.0017** | 86.901 | **<0.001** |
| **InfA** | 213.337 | **<0.001** | 23.451 | **<0.001** | 0.615 | 0.433 | 69.044 | **<0.001** | 22.275 | **<0.001** | 4.884 | **0.027** |
| **InfB** | 57.782 | **<0.001** | 81.865 | **<0.001** | 2.356 | 0.125 | 1.572 | 0.2103 | 0.564 | 0.4527 | 1.389 | 0.239 |
| **HRSV** | 334.801 | **<0.001** | 1207.403 | **<0.001** | 94.923 | **<0.001** | 387.087 | **<0.001** | 31.211 | **<0.001** | 0.113 | 0.737 |

* χ² is the chi-square test statistic used to compare detection rates between the different age groups. Statistical significance was determined at *p* < 0.05.
