# Supplementary material for: Post-Pandemic Shifts in Pediatric Respiratory Pathogens and Co-Infection Dynamics in Northwest China: A Large-Scale Retrospective Study from 2021 to 2025
Source: Research Square preprint supplement (doi:10.21203/rs.3.rs-7467354/v1), 2025-09-17
Supplement: Supplementary file 7 [file d6a28993737ca3e833eac603.docx]

**Supplementary Table 1.** Regional distribution of total, positive, and negative cases across provinces.

| **province** | **Total** | **Positive** | **Negative** |
| --- | --- | --- | --- |
| **Shaanxi** | 35290 | 21478 | 13812 |
| **Gansu Province** | 1570 | 887 | 683 |
| **Shanxi** | 244 | 118 | 126 |
| **Ningxia** | 92 | 42 | 50 |
| **Henan** | 73 | 42 | 31 |
| **Qinghai** | 67 | 41 | 26 |
| **Sichuan** | 47 | 30 | 17 |
| **Xinjiang** | 34 | 15 | 19 |
| **Inner Mongolia** | 33 | 14 | 19 |
| **Hubei Province** | 29 | 18 | 11 |
| **Jiangsu** | 28 | 18 | 10 |
| **Zhejiang** | 27 | 14 | 13 |
| **Anhui Province** | 17 | 8 | 9 |
| **Shandong** | 16 | 8 | 8 |
| **Fujian** | 16 | 11 | 5 |
| **Jiangxi** | 14 | 7 | 7 |
| **Hebei Province** | 14 | 7 | 7 |
| **Beijing** | 12 | 6 | 6 |
| **Guangdong** | 10 | 8 | 2 |
| **Hunan** | 8 | 6 | 2 |
| **Tianjin** | 6 | 5 | 1 |
| **Guizhou** | 6 | 4 | 2 |
| **Chongqing** | 6 | 3 | 3 |
| **Shanghai** | 5 | 4 | 1 |
| **Yunnan** | 4 | 1 | 3 |
| **Liaoning** | 4 | 2 | 2 |
| **Xizang** | 3 | 3 | 0 |
| **Jilin** | 1 | 1 | 0 |
| **Hainan** | 1 | 1 | 0 |
| **Heilongjiang Province** | 1 | 1 | 0 |
