# Supplementary material for: Post-Pandemic Shifts in Pediatric Respiratory Pathogens and Co-Infection Dynamics in Northwest China: A Large-Scale Retrospective Study from 2021 to 2025
Source: Research Square preprint supplement (doi:10.21203/rs.3.rs-7467354/v1), 2025-09-17
Supplement: Supplementary file 8 [file d9e24af7fa2e3114458a75c4.docx]

**Supplementary Table 8.** Full list of pathogen co-infection combinations and frequencies.

| **Infection Combination** | **Count** | **Number Pathogens** |
| --- | --- | --- |
| **HRV+Mp** | 596 | 2 |
| **HRV+HPIV** | 351 | 2 |
| **HRV+HRSV** | 264 | 2 |
| **HRV+HADV** | 253 | 2 |
| **HADV+Mp** | 218 | 2 |
| **HRV+HMPV** | 131 | 2 |
| **HPIV+HRSV** | 110 | 2 |
| **HPIV+Mp** | 106 | 2 |
| **Mp+HRSV** | 105 | 2 |
| **Mp+InfA** | 99 | 2 |
| **HRV+InfA** | 95 | 2 |
| **HRV+HCOV** | 81 | 2 |
| **HRV+HboV** | 80 | 2 |
| **Mp+InfB** | 75 | 2 |
| **HCOV+Mp** | 69 | 2 |
| **HMPV+Mp** | 66 | 2 |
| **HPIV+HADV** | 62 | 2 |
| **HPIV+HMPV** | 53 | 2 |
| **HADV+HRSV** | 53 | 2 |
| **HPIV+HCOV** | 49 | 2 |
| **InfA+HRSV** | 46 | 2 |
| **HADV+HMPV** | 40 | 2 |
| **HADV+InfB** | 35 | 2 |
| **HMPV+HRSV** | 34 | 2 |
| **HRV+Ch** | 29 | 2 |
| **HMPV+InfA** | 28 | 2 |
| **HADV+InfA** | 28 | 2 |
| **HPIV+HboV** | 26 | 2 |
| **HboV+Mp** | 25 | 2 |
| **InfB+HRSV** | 23 | 2 |
| **HRV+InfB** | 20 | 2 |
| **HCOV+HRSV** | 20 | 2 |
| **HADV+HCOV** | 18 | 2 |
| **HboV+HRSV** | 16 | 2 |
| **InfA+InfB** | 13 | 2 |
| **HPIV+InfA** | 11 | 2 |
| **HMPV+InfB** | 11 | 2 |
| **HCOV+InfA** | 10 | 2 |
| **HboV+InfA** | 8 | 2 |
| **HMPV+HCOV** | 7 | 2 |
| **HboV+HCOV** | 7 | 2 |
| **HADV+HboV** | 7 | 2 |
| **HADV+Ch** | 6 | 2 |
| **HPIV+InfB** | 5 | 2 |
| **HMPV+HboV** | 5 | 2 |
| **Ch+HRSV** | 4 | 2 |
| **Ch+Mp** | 3 | 2 |
| **Ch+InfA** | 3 | 2 |
| **HCOV+InfB** | 2 | 2 |
| **HCOV+Ch** | 1 | 2 |
| **HRV+HADV+Mp** | 40 | 3 |
| **HRV+HPIV+Mp** | 29 | 3 |
| **HRV+HPIV+HADV** | 18 | 3 |
| **HRV+Mp+HRSV** | 16 | 3 |
| **HRV+HPIV+HboV** | 12 | 3 |
| **HRV+HMPV+Mp** | 11 | 3 |
| **HRV+HboV+Mp** | 9 | 3 |
| **HADV+Mp+InfB** | 9 | 3 |
| **HADV+Mp+InfA** | 9 | 3 |
| **HRV+HPIV+HRSV** | 8 | 3 |
| **HRV+HCOV+Mp** | 8 | 3 |
| **HRV+HADV+HMPV** | 8 | 3 |
| **HRV+HADV+HCOV** | 8 | 3 |
| **HPIV+HADV+Mp** | 8 | 3 |
| **HRV+HPIV+HCOV** | 7 | 3 |
| **HRV+HboV+HRSV** | 7 | 3 |
| **HRV+HADV+HRSV** | 7 | 3 |
| **HADV+HMPV+Mp** | 7 | 3 |
| **HRV+Mp+InfA** | 6 | 3 |
| **HRV+HPIV+HMPV** | 6 | 3 |
| **HADV+Mp+HRSV** | 6 | 3 |
| **HRV+HADV+HboV** | 5 | 3 |
| **HADV+HCOV+Mp** | 5 | 3 |
| **HADV+InfB+HRSV** | 4 | 3 |
| **HADV+InfA+HRSV** | 4 | 3 |
| **Mp+InfB+HRSV** | 3 | 3 |
| **HRV+Mp+InfB** | 3 | 3 |
| **HRV+InfA+HRSV** | 3 | 3 |
| **HRV+HPIV+InfA** | 3 | 3 |
| **HRV+HCOV+HRSV** | 3 | 3 |
| **HRV+HboV+HCOV** | 3 | 3 |
| **HRV+HADV+InfA** | 3 | 3 |
| **HPIV+Mp+HRSV** | 3 | 3 |
| **HPIV+HMPV+HRSV** | 3 | 3 |
| **HPIV+HboV+Mp** | 3 | 3 |
| **HPIV+HboV+HRSV** | 3 | 3 |
| **HMPV+Mp+InfB** | 3 | 3 |
| **HADV+HboV+Mp** | 3 | 3 |
| **HADV+HboV+HRSV** | 3 | 3 |
| **Mp+InfA+InfB** | 2 | 3 |
| **HRV+HPIV+Ch** | 2 | 3 |
| **HRV+HMPV+HCOV** | 2 | 3 |
| **HRV+HCOV+Ch** | 2 | 3 |
| **HPIV+HCOV+HRSV** | 2 | 3 |
| **HPIV+HADV+HRSV** | 2 | 3 |
| **HADV+HMPV+HCOV** | 2 | 3 |
| **Mp+InfA+HRSV** | 1 | 3 |
| **HRV+InfB+HRSV** | 1 | 3 |
| **HRV+HPIV+InfB** | 1 | 3 |
| **HRV+HMPV+InfB** | 1 | 3 |
| **HRV+HMPV+InfA** | 1 | 3 |
| **HRV+HMPV+HRSV** | 1 | 3 |
| **HRV+HMPV+HboV** | 1 | 3 |
| **HRV+HMPV+Ch** | 1 | 3 |
| **HRV+HboV+InfA** | 1 | 3 |
| **HRV+HboV+Ch** | 1 | 3 |
| **HRV+HADV+InfB** | 1 | 3 |
| **HRV+Ch+HRSV** | 1 | 3 |
| **HPIV+Mp+InfB** | 1 | 3 |
| **HPIV+Mp+InfA** | 1 | 3 |
| **HPIV+InfB+HRSV** | 1 | 3 |
| **HPIV+InfA+HRSV** | 1 | 3 |
| **HPIV+HMPV+Mp** | 1 | 3 |
| **HPIV+HMPV+InfB** | 1 | 3 |
| **HPIV+HCOV+Mp** | 1 | 3 |
| **HPIV+HCOV+InfB** | 1 | 3 |
| **HPIV+HCOV+InfA** | 1 | 3 |
| **HPIV+HboV+HCOV** | 1 | 3 |
| **HPIV+HADV+InfB** | 1 | 3 |
| **HPIV+HADV+InfA** | 1 | 3 |
| **HPIV+HADV+HMPV** | 1 | 3 |
| **HPIV+HADV+HCOV** | 1 | 3 |
| **HPIV+HADV+HboV** | 1 | 3 |
| **HPIV+HADV+Ch** | 1 | 3 |
| **HPIV+Ch+HRSV** | 1 | 3 |
| **HMPV+Mp+InfA** | 1 | 3 |
| **HMPV+Mp+HRSV** | 1 | 3 |
| **HMPV+HboV+Mp** | 1 | 3 |
| **HMPV+HboV+InfB** | 1 | 3 |
| **HCOV+Mp+HRSV** | 1 | 3 |
| **HboV+InfA+HRSV** | 1 | 3 |
| **HboV+HCOV+HRSV** | 1 | 3 |
| **HADV+HMPV+InfB** | 1 | 3 |
| **HADV+HMPV+InfA** | 1 | 3 |
| **HADV+HMPV+HRSV** | 1 | 3 |
| **HADV+HMPV+HboV** | 1 | 3 |
| **HADV+HCOV+InfB** | 1 | 3 |
| **HADV+HCOV+InfA** | 1 | 3 |
| **HADV+HCOV+HRSV** | 1 | 3 |
| **HADV+HboV+InfB** | 1 | 3 |
| **Ch+Mp+InfA** | 1 | 3 |
| **HRV+HPIV+HADV+Mp** | 4 | 4 |
| **HRV+HPIV+HMPV+HboV** | 2 | 4 |
| **HRV+Mp+InfA+HRSV** | 1 | 4 |
| **HRV+HPIV+Mp+InfA** | 1 | 4 |
| **HRV+HPIV+InfB+HRSV** | 1 | 4 |
| **HRV+HPIV+HADV+InfB** | 1 | 4 |
| **HRV+HPIV+HADV+HRSV** | 1 | 4 |
| **HRV+HPIV+HADV+HMPV** | 1 | 4 |
| **HRV+HPIV+HADV+HCOV** | 1 | 4 |
| **HRV+HCOV+Ch+Mp** | 1 | 4 |
| **HRV+HboV+Mp+HRSV** | 1 | 4 |
| **HRV+HboV+HCOV+HRSV** | 1 | 4 |
| **HRV+HADV+HMPV+HCOV** | 1 | 4 |
| **HRV+HADV+HCOV+Mp** | 1 | 4 |
| **HRV+HADV+HboV+Mp** | 1 | 4 |
| **HRV+HADV+HboV+HRSV** | 1 | 4 |
| **HPIV+Mp+InfB+HRSV** | 1 | 4 |
| **HPIV+Mp+InfA+InfB** | 1 | 4 |
| **HPIV+HboV+HCOV+Mp** | 1 | 4 |
| **HPIV+HADV+HCOV+InfB** | 1 | 4 |
| **HCOV+Mp+InfA+HRSV** | 1 | 4 |
| **HADV+HMPV+Mp+InfA** | 1 | 4 |
| **HADV+HMPV+Mp+HRSV** | 1 | 4 |
| **HRV+HPIV+HADV+HMPV+HRSV** | 1 | 5 |
| **HADV+HMPV+Mp+InfA+HRSV** | 1 | 5 |
