# Supplementary material for: Post-Pandemic Shifts in Pediatric Respiratory Pathogens and Co-Infection Dynamics in Northwest China: A Large-Scale Retrospective Study from 2021 to 2025
Source: Research Square preprint supplement (doi:10.21203/rs.3.rs-7467354/v1), 2025-09-17
Supplement: Supplementary file 9 [file fd66cefe6621c568db15f5b4.docx]

**Supplementary Table 9.** Table of Case Count by Pathogen, Infection Form (Single or Co infection), and Different Age Groups.

|  | **0-2** | | **3-5** | | **6-12** | | **13-18** | |
| --- | --- | --- | --- | --- | --- | --- | --- | --- |
|  | **Single infection (n)** | **Co-infection (n)** | **Single infection (n)** | **Co-infection (n)** | **Single infection (n)** | **Co-infection (n)** | **Single infection (n)** | **Co-infection (n)** |
| **HRV** | 2059 | 945 | 1279 | 715 | 968 | 484 | 64 | 17 |
| **HPIV** | 1135 | 580 | 425 | 229 | 188 | 106 | 16 | 2 |
| **HADV** | 356 | 281 | 381 | 326 | 385 | 292 | 20 | 4 |
| **HMPV** | 480 | 201 | 518 | 146 | 155 | 91 | 6 | 3 |
| **HboV** | 182 | 178 | 57 | 50 | 12 | 12 | 0 | 0 |
| **HCOV** | 180 | 157 | 96 | 93 | 70 | 72 | 8 | 2 |
| **Ch** | 48 | 12 | 6 | 6 | 88 | 32 | 10 | 7 |
| **Mp** | 539 | 391 | 1042 | 489 | 2057 | 678 | 45 | 14 |
| **InfA** | 771 | 167 | 933 | 111 | 593 | 108 | 29 | 3 |
| **InfB** | 146 | 76 | 201 | 66 | 220 | 79 | 11 | 5 |
| **HRSV** | 2394 | 514 | 719 | 160 | 139 | 96 | 12 | 6 |
